# Supplementary material for: Efficacy of Two Chlamydia abortus Subcellular Vaccines in a Pregnant Ewe Challenge Model for Ovine Enzootic Abortion
Source: MDPI journal article supplement (doi:10.3390/vaccines9080898), 2021-08-13
Supplement: s1 [file s1]

**Group 1: Cevac Chlamydia**

| Ewe No | Lambed (No) | Aborted (No) | L/A | Macroscopic examination |    |    |    | mZN  |     |    |    | PCR     |         |          |        |       |    |
|--------|-------------|--------------|-----|-------------------------|----|----|----|------|-----|----|----|---------|---------|----------|--------|-------|----|
|        |             |              |     | P1                      | P2 | P3 | P4 | P1   | P2  | P3 | P4 | Typing  | Swabs   | P1       | P2     | P3    | P4 |
| 203D   | 2           | 0            | L   | 10                      | 0  |    |    | +++  | +++ |    |    | wt      | 12      | 3900000  | 494200 |       |    |
| 215D   | 1           | 0            | L   | 0                       |    |    |    | -    |     |    |    |         | 14      | 37.71    |        |       |    |
| 221D   | 2           | 0            | L   | 0                       | 0  |    |    | -    | 0   |    |    |         | 43      | 69.12    | 0      |       |    |
| 283D   | 2           | 0            | L   | 0                       | 0  |    |    | -    | -   |    |    |         | 158     | 124.69   | 126.88 |       |    |
| 316D   | 0           | 1            | A   | 100                     |    |    |    | ++++ |     |    |    | vt + wt | 4340000 | 2830000  |        |       |    |
| 328D   | 2           | 0            | L   | 25                      | NF |    |    | +    | NF  |    |    | wt      | 3056    | 42183.82 | NF     |       |    |
| 1100J  | 2           | 0            | L   | 0                       | 0  |    |    | -    | -   |    |    | wt      | 73      | 306.29   | 617.94 |       |    |
| 2295E  | 1 *         | 0            | L   | 0                       |    |    |    | -    |     |    |    |         | 812     | 54.94    |        |       |    |
| 2304E  | 1           | 0            | L   | 0                       |    |    |    | -    |     |    |    |         | 46      | 48.48    |        |       |    |
| 2305E  | 2           | 0            | L   | 0                       | 0  |    |    | -    | -   |    |    |         | 17      | 105.66   | 27.94  |       |    |
| 2311E  | 1           | 0            | L   | 0                       |    |    |    | -    |     |    |    |         | 13      | 516.6    |        |       |    |
| 2312E  | 2           | 0            | L   | 0                       | 0  |    |    | -    | -   |    |    |         | 34      | 46.51    | 43.66  |       |    |
| 2313E  | 3           | 0            | L   | 0                       | 0  | 0  |    | -    | -   | -  |    |         | 53      | 49.5     | 32.88  | 18.94 |    |
| 2322E  | 2           | 0            | L   | 0                       | 0  |    |    | -    | -   |    |    |         | 21      | 0        | 14.81  |       |    |
| 2333E  | 1           | 0            | L   | 0                       |    |    |    | -    |     |    |    |         | 1544    | 0        |        |       |    |
| 2340E  | 1           | 0            | L   | 85                      |    |    |    | ++++ |     |    |    | wt      | 370000  | 5820000  |        |       |    |
| 2389E  | 2           | 0            | L   | 0                       | NF |    |    | -    | NF  |    |    | wt      | 14      | 0        | NF     |       |    |
| 3641G  | 2           | 0            | L   | 0                       | 0  |    |    | -    | -   |    |    |         | 29      | 361.31   | 29.99  |       |    |
| 3645G  | 2           | 0            | L   | 0                       | 0  |    |    | -    | -   |    |    |         | 26      | 0        | 0      |       |    |
| 3701G  | 2           | 0            | L   | 0                       | 0  |    |    | -    | -   |    |    |         | 13      | 18.41    | 12.48  |       |    |
| 3719G  | 2           | 0            | L   | 0                       | 0  |    |    | -    | -   |    |    |         | 16      | 0        | 16.71  |       |    |
| 5348G  | 2           | 0            | L   | 0                       | NF |    |    | -    | NF  |    |    |         | 959     | 121.4    |        |       |    |
| 5388G  | 2           | 0            | L   | 0                       | 0  |    |    | -    | -   |    |    |         | 8       | 11.7     | 0      |       |    |
| 5389G  | 2           | 0            | L   | 0                       | NF |    |    | -    | NF  |    |    |         | 242     | 19.14    | NF     |       |    |
| 5425G  | 2           | 0            | L   | 0                       | 0  |    |    | -    | -   |    |    |         | 223     | 32.36    | 0      |       |    |
|        |             |              |     | 40                      | 1  | 24 |    |      |     |    |    |         |         |          |        |       |    |
|        |             |              |     |                         |    | 1  |    |      |     |    |    |         |         |          |        |       |    |

\* found dead in membranes; no bacteriological or pathological evidence of EAE.

**Group 2: COMC**

| Ewe No | Lambled (No) | Aborted (No) | L/A | Macroscopic examination |    |    |    | mZN |    |    |    | PCR   |          |         |    |    |
|--------|--------------|--------------|-----|-------------------------|----|----|----|-----|----|----|----|-------|----------|---------|----|----|
|        |              |              |     | P1                      | P2 | P3 | P4 | P1  | P2 | P3 | P4 | Swabs | P1       | P2      | P3 | P4 |
| 361D   | 2            | 0            | L   | 0                       | 0  |    |    | -   | -  |    |    | 34    | 3.98     | 0       |    |    |
| 372D   | 2            | 0            | L   | 0                       | 0  |    |    | -   | -  |    |    | 90    | 7.44     | 4.41    |    |    |
| 434D   | 2            | 0            | L   | 0                       | 0  |    |    | -   | -  |    |    | 19    | 0        | 0       |    |    |
| 445D   | 2            | 0            | L   | 0                       | 0  |    |    | -   | -  |    |    | 106   | 0        | 15.19   |    |    |
| 454D   | 3            | 0            | L   | 0                       | 0  | 0  |    | -   | -  | -  |    | 24    | 0        | 0       | 0  |    |
| 462D   | 2            | 0            | L   | 0                       | 0  |    |    | -   | -  |    |    | 29    | 31.13    | 13.5    |    |    |
| 2058E  | 1            | 0            | L   | 0                       |    |    |    | -   |    |    |    | 37    | 3.04     |         |    |    |
| 2348E  | 1            | 0            | L   | 0                       |    |    |    | -   |    |    |    | 29    | 0        |         |    |    |
| 2367E  | 3            | 0            | L   | 0                       | 0  | NF |    | -   | -  | NF |    | 0     | 5.19     | 0       | NF |    |
| 2370E  | 2            | 0            | L   | 0                       | 0  |    |    | -   | -  |    |    | 44    | 435.03   | 8.25    |    |    |
| 2379E  | 2            | 0            | L   | 0                       | 0  |    |    | -   | -  |    |    | 25    | 8.1      | 10.7    |    |    |
| 2384E  | 3            | 0            | L   | 0                       | 0  | NF |    | -   | -  | NF |    | 0     | 10173.31 | 5083.62 | NF |    |
| 2386E  | 2            | 0            | L   | 0                       | 0  |    |    | -   | -  |    |    | 2010  | 5.22     | 52.78   |    |    |
| 2399E  | 2            | 0            | L   | 0                       | 0  |    |    | -   | -  |    |    | 181   | 296.11   | 9.11    |    |    |
| 2470E  | 1            | 0            | L   | 0                       |    |    |    | -   |    |    |    | 18    | 0        |         |    |    |
| 2481E  | 2            | 0            | L   | 0                       | NF |    |    | -   | NF |    |    | 71    | 3.77     | 0       |    |    |
| 2492E  | 1            | 0            | L   | 0                       |    |    |    | +   |    |    |    | 0     | 68820.93 |         |    |    |
| 2569E  | 1            | 0            | L   | 0                       |    |    |    | +   |    |    |    | 57117 | 7733.82  |         |    |    |
| 3722G  | 2            | 0            | L   | 0                       | 0  |    |    | +++ | ++ |    |    | 92264 | 7.9      | 0       |    |    |
| 3741G  | 2            | 0            | L   | 0                       | 0  |    |    | -   | -  |    |    | 70    | 142974.5 | 116503  |    |    |
| 3746G  | 2            | 0            | L   | 0                       | 0  |    |    | -   | -  |    |    | 17    | 7.54     | 0       |    |    |
| 3774G  | 2            | 0            | L   | 0                       | 0  |    |    | -   | -  |    |    | 35    | 0        | 11.62   |    |    |
| 5430G  | 1            | 0            | L   | 0                       |    |    |    | -   |    |    |    | 35    | 3.59     |         |    |    |
| 5504G  | 1            | 0            | L   | 0                       |    |    |    | -   |    |    |    | 197   | 0        |         |    |    |
| 5509G  | 2            | 0            | L   | 0                       | NF |    |    | -   | NF |    |    | 1     | 15.47    |         |    |    |
| 5511G  | 1            | 0            | L   | 0                       |    |    |    | -   |    |    |    | 7     | 49.13    |         |    |    |
|        |              |              |     | 47                      | 0  | 26 |    |     |    |    |    |       |          |         |    |    |
|        |              |              |     |                         |    | 0  |    |     |    |    |    |       |          |         |    |    |

**Group 3: OG-MOMP**

| Ewe No | Lambled (No) | Aborted (No) | L/A | Macroscopic examination |    |    |    | mZN  |    |    |    | PCR     |          |        |       |    |  |  |
|--------|--------------|--------------|-----|-------------------------|----|----|----|------|----|----|----|---------|----------|--------|-------|----|--|--|
|        |              |              |     | P1                      | P2 | P3 | P4 | P1   | P2 | P3 | P4 | Swabs   | P1       | P2     | P3    | P4 |  |  |
| 466D   | 2            | 0            | L   | 0                       | 0  |    |    | -    | -  |    |    | 6       | 31.56    | 27.39  |       |    |  |  |
| 471D   | 1            | 0            | L   | 0                       |    |    |    | -    |    |    |    | 10      | 27.52    |        |       |    |  |  |
| 473D   | 1            | 0            | L   | 0                       |    |    |    | -    |    |    |    | 0       | 31.56    |        |       |    |  |  |
| 479D   | 3            | 0            | L   | 0                       | 0  | 0  |    | -    | -  | -  |    | 21      | 24.48    | 200.77 | 23.79 |    |  |  |
| 503D   | 2            | 0            | L   | 0                       | 0  |    |    | -    | -  |    |    | 40      | 100.58   | 59.11  |       |    |  |  |
| 525D   | 2            | 0            | L   | 0                       | 0  |    |    | -    | -  |    |    | 87      | 67.45    | 54.39  |       |    |  |  |
| 588D   | 1            | 0            | L   | 20                      |    |    |    | ++++ |    |    |    | 1860000 | 1990000  |        |       |    |  |  |
| 608D   | 2            | 0            | L   | 40                      | 0  |    |    | +++  | ++ |    |    | 2720000 | 519024.9 | 65633  |       |    |  |  |
| 2494E  | 2            | 0            | L   | 0                       | 0  |    |    | -    | -  |    |    | 9       | 297.52   | 186.26 |       |    |  |  |
| 2497E  | 1            | 0            | L   | 0                       |    |    |    | -    |    |    |    | 79      | 189.85   |        |       |    |  |  |
| 2502E  | 2            | 0            | L   | 0                       | 0  |    |    | -    | -  |    |    | 5       | 66.45    | 165.11 |       |    |  |  |
| 2548E  | 2            | 0            | L   | 0                       | NF |    |    | -    | NF |    |    | 7       | 901.17   | NF     |       |    |  |  |
| 2553E  | 2            | 0            | L   | 0                       | 0  |    |    | -    | -  |    |    | 6       | 151.68   | 53.73  |       |    |  |  |
| 2568E  | 1            | 0            | L   | 100                     |    |    |    | +++  |    |    |    | 231125  | 1900000  |        |       |    |  |  |
| 2571E  | 1            | 0            | L   | 0                       |    |    |    | -    |    |    |    | 79      | 189.49   |        |       |    |  |  |
| 2639E  | 1            | 0            | L   | 0                       |    |    |    | -    |    |    |    | 26      | 143.96   |        |       |    |  |  |
| 3775G  | 2            | 0            | L   | 0                       | 0  |    |    | -    | -  |    |    | 59      | 0        | 0      |       |    |  |  |
| 3801G  | 2            | 0            | L   | 0                       | 0  |    |    | -    | -  |    |    | 61      | 20.45    | 6.02   |       |    |  |  |
| 3834G  | 1            | 0            | L   | 0                       |    |    |    | -    |    |    |    | 56      | 45.3     |        |       |    |  |  |
| 3841G  | 2            | 0            | L   | 0                       | 0  |    |    | -    | -  |    |    | 25      | 123.22   | 31.06  |       |    |  |  |
| 5532G  | 1            | 0            | L   | 0                       |    |    |    | -    |    |    |    | 11      | 8.86     |        |       |    |  |  |
| 5533G  | 1            | 0            | L   | 0                       |    |    |    | -    |    |    |    | 3       | 17.91    |        |       |    |  |  |
| 5543G  | 2            | 0            | L   | 0                       | 0  |    |    | -    | -  |    |    | 20      | 884.49   | 21.4   |       |    |  |  |
| 5616G  | 2            | 0            | L   | 0                       | 0  |    |    | -    | -  |    |    | 27      | 21.4     | 11.2   |       |    |  |  |
|        |              |              |     | 39                      | 0  | 24 |    |      |    |    |    |         |          |        |       |    |  |  |
|        |              |              |     |                         |    | 0  |    |      |    |    |    |         |          |        |       |    |  |  |

**Group 4: Challenge Control**

| Ewe No | Lambled (No) | Aborted (No) | L/A | Macroscopic examination |     |     |    | mZN  |      |      |    | PCR     |           |         |         |    |
|--------|--------------|--------------|-----|-------------------------|-----|-----|----|------|------|------|----|---------|-----------|---------|---------|----|
|        |              |              |     | P1                      | P2  | P3  | P4 | P1   | P2   | P3   | P4 | Swabs   | P1        | P2      | P3      | P4 |
| 76D    | 1            | 0            | L   | 1                       |     |     |    | +++  |      |      |    | 48      | 8962.34   |         |         |    |
| 122D   | 0            | 4            | A   | 100                     | 100 | 100 | NF | ++++ | ++++ | ++++ | NF | 2730000 | 955686.1  | 6190000 | 1040000 | NF |
| 131D   | 0            | 3            | A   | 100                     | 100 | 75  |    | +++  | +++  | +++  |    | 560447  | 450079.8  | 59446.8 | 3420000 |    |
| 1065D  | 1            | 0            | L   | 10                      |     |     |    | ++++ |      |      |    | 2690000 | 3670000   |         |         |    |
| 1087D  | 2            | 0            | L   | 5                       | NF  |     |    | +++  | 50   |      |    | 2383    | 589006.8  | NF      |         |    |
| 1116D  | 0            | 2            | A   | 100                     | 100 |     |    | ++   | +++  |      |    | 968330  | 75131.09  | 1810000 |         |    |
| 2092E  | 0            | 2            | A   | 100                     | 100 |     |    | +++  | ++++ |      |    | 1620000 | 183552.7  | 1.4E+07 |         |    |
| 2093E  | 0            | 1            | A   | 100                     |     |     |    | +++  |      |      |    | 383942  | 1530000   |         |         |    |
| 2097E  | 3            | 0            | L   | 90                      | 60  | 50  |    | +++  | +++  | +++  |    | 4280000 | 1960000   | 8120000 | 2180000 |    |
| 2113E  | 0            | 2            | A   | 100                     | 70  |     |    | +++  | ++   |      |    | 2790000 | 2790000   | 710139  |         |    |
| 2246E  | 0            | 2            | A   | 100                     | 80  |     |    | +++  | +++  |      |    | 3540000 | 381150.1  | 2050000 |         |    |
| 2249E  | 2            | 0            | L   | 50                      | NF  |     |    | ++   | NF   |      |    | 1870000 | no sample | NF      |         |    |
| 2266E  | 0            | 2 *          | A   | 100                     | NF  |     |    | ++   | NF   |      |    | 6590000 | 306795.6  | NF      |         |    |
| 2283E  | 1            | 0            | L   | 100                     |     |     |    | ++   |      |      |    | 134613  | 154960.2  |         |         |    |
| 2285E  | 1            | 1 **         | A   | 90                      | NF  |     |    | ++   | NF   |      |    | 1490000 | 1680000   | NF      |         |    |
| 4461G  | 0            | 2 ***        | A   | 50                      | 50  |     |    | +++  | +++  |      |    | 2940000 | 797733    | 2100000 |         |    |
| 4829G  | 1            | 0            | L   | 50                      |     |     |    | +++  |      |      |    | 118101  | 1110000   |         |         |    |
| 5043G  | 1            | 1            | A   | 100                     | 100 |     |    | ++++ | ++   |      |    | 998702  | 2030000   | 177573  |         |    |
| 5153G  | 1            | 0            | L   | 80                      |     |     |    | +++  |      |      |    | 1200000 | 381671.1  |         |         |    |
| 5187G  | 0            | 2            | A   | 50                      | 100 |     |    | ++   | ++++ |      |    | 851802  | 66430.29  | 1450000 |         |    |
| 5276G  | 2            | 0            | L   | 0                       | 5   |     |    | -    | +++  |      |    | 42097   | 1741.28   | 679085  |         |    |
| 5290G  | 1            | 0            | L   | 50                      |     |     |    | +++  |      |      |    | 1020000 | 130309.3  |         |         |    |
| 5343G  | 2            | 0            | L   | 20                      | 10  |     |    | +++  | +++  |      |    | 504     | 793136.2  | 621677  |         |    |
| 5724G  | 2            | 1            | A   | 0                       | NF  | 20  |    | ++   | NF   | ++   |    | 1496    | 117209.6  | NF      | 554696  |    |
| 5778G  | 2            | 0            | L   | 0                       | 0   |     |    | -    | -    |      |    | 45      | 192.87    | 34      |         |    |
|        |              |              |     | 23                      | 20  |     |    |      |      |      |    |         |           |         |         |    |
|        |              |              |     |                         |     |     |    |      |      |      |    |         |           |         |         |    |

\* born weak; both died within 24 hrs

\*\* born weak; euthanised 37hrs later

\*\*\* born weak; euthanised after 11hrs

**Group 5: Negative Control**

| Ewe No | Lambled (No) | Aborted (No) | L/A | Macroscopic examination |    |    |    | mZN |    |    |    | PCR   |       |       |    |    |
|--------|--------------|--------------|-----|-------------------------|----|----|----|-----|----|----|----|-------|-------|-------|----|----|
|        |              |              |     | P1                      | P2 | P3 | P4 | P1  | P2 | P3 | P4 | Swabs | P1    | P2    | P3 | P4 |
| 91D    | 2            | 0            | L   | 0                       | 0  |    |    | -   | -  |    |    | 9     | 0     | 0     |    |    |
| 1077D  | 2            | 0            | L   | 0                       | 0  |    |    | -   | -  |    |    | 19    | 0     | 0     |    |    |
| 1086D  | 2            | 0            | L   | 0                       | 0  |    |    | -   | -  |    |    | 30    | 19.54 | 0     |    |    |
| 1088D  | 2            | 0            | L   | 0                       | 0  |    |    | -   | -  |    |    | 9     | 0     | 0     |    |    |
| 1092D  | 1            | 0            | L   | 0                       |    |    |    | -   |    |    |    | 23    | 0     |       |    |    |
| 1093D  | 2            | 0            | L   | 0                       | 0  |    |    | -   | -  |    |    | 24    | 0     | 0     |    |    |
| 1120D  | 1            | 0            | L   | 0                       |    |    |    | -   |    |    |    | 6     | 77.94 |       |    |    |
| 2055E  | 2            | 0            | L   | 0                       | 0  |    |    | -   | -  |    |    | 15    | 0     | 0     |    |    |
| 2150E  | 1            | 0            | L   | 0                       |    |    |    | -   |    |    |    | 13    | 0     |       |    |    |
| 2161E  | 2            | 0            | L   | 0                       | 0  |    |    | -   | -  |    |    | 53    | 0     | 0     |    |    |
| 2195E  | 2            | 0            | L   | 0                       | 0  |    |    | -   | -  |    |    | 15    | 0     | 0     |    |    |
| 2202E  | 2            | 0            | L   | 0                       | 0  |    |    | -   | -  |    |    | 13    | 0     | 0     |    |    |
| 2294E  | 2            | 0            | L   | 0                       | 0  |    |    | -   | -  |    |    | 8     | 0     | 0     |    |    |
| 3375G  | 1            | 0            | L   | 0                       |    |    |    | -   |    |    |    | 0     | 0     |       |    |    |
| 3443G  | 1            | 0            | L   | 0                       |    |    |    | -   |    |    |    | 9     | 0     |       |    |    |
| 3553G  | 2            | 0            | L   | 0                       | 0  |    |    | -   | -  |    |    | 9     | 25.48 | 0     |    |    |
| 3599G  | 1            | 0            | L   | 0                       |    |    |    | -   |    |    |    | 10    | 0     |       |    |    |
| 3607G  | 2            | 0            | L   | 0                       | 0  |    |    | -   | -  |    |    | 12    | 0     | 0     |    |    |
| 3620G  | 1            | 0            | L   | 0                       |    |    |    | -   |    |    |    | 0     | 0     |       |    |    |
| 3855G  | 2            | 0            | L   | 0                       | 0  |    |    | -   | -  |    |    | 12    | 0     | 16.23 |    |    |
| 4956G  | 3            | 0            | L   | 0                       | 0  | NF |    | -   | -  | NF |    | 15    | 0     | 0     | NF |    |
| 4982G  | 2            | 0            | L   | 0                       | 0  |    |    | -   | -  |    |    | 23    | 15.09 | 0     |    |    |
| 5057G  | 2            | 0            | L   | 0                       | 0  |    |    | -   | -  |    |    | 28    | 14.58 | 0     |    |    |
| 5344G  | 2            | 0            | L   | 0                       | 0  |    |    | -   | -  |    |    | 11    | 0     | 0     |    |    |
| 5345G  | 1            | 0            | L   | 0                       |    |    |    | -   |    |    |    | 7     | 0     |       |    |    |
|        |              |              |     | 43                      | 0  | 25 |    |     |    |    |    |       |       |       |    |    |
|        |              |              |     |                         |    | 0  |    |     |    |    |    |       |       |       |    |    |
