# Supplementary material for: Efficacy of Two Chlamydia abortus Subcellular Vaccines in a Pregnant Ewe Challenge Model for Ovine Enzootic Abortion
Source: MDPI journal article supplement (doi:10.3390/vaccines9080898), 2021-08-13
Supplement: s1 [file s1]

# DETAILS OF EXPERIMENTS ON FARM ANIMALS

Number of Experiments

E 30 / 11

Date: 13JUN11

HO Project Licence Holder David Longbottom

Signature

Title of Project Licence Pathogenesis and control of infectious reproductive loss/failure in ruminants and pigs

PPL 60/3869

Licensee responsible for work David Longbottom

PIL 60/8238

Other licensees involved Morag Livingstone and Nick Wheelhouse

Procedure number to be used (see project licence section 19) 19b1

Short title of experiment Protective efficacy of inactivated, subcellular and recombinant chlamydial antigens in pregnant sheep

**Animals (Scientific Procedures) Act, 1986.** It is a criminal offence to perform any procedure on animals without appropriate Home Office personal and project cover. **BEFORE** submission, all experiments must be endorsed by the Project Licence holder who should retain a copy of this form.

Have all alternatives to animal use been explored?

Yes

☒

No

## OTHER REGULATORY MATTERS

Does any of the proposed work involve an organism which has been genetically modified? YES ☐ / NO ☒

If YES give GMAG No.

State that the project conforms to the regulations concerning:

COSHH/H&S

Yes

SAPO

NO

Radioisotopes

NO

## STATISTICS

All proposed experiments must be statistically evaluated by BioSS **BEFORE** submission. State if this has been done? YES ☒ / NO ☐

BioSS Signature:

## COSTINGS (to be completed in consultation with the Clinical Department)

Animal purchase 175 x 120 + 10 x 500

£ 26000

Rental 350 x 200

£ 70000

Maintenance No. animals x Daily charge x No. days

£

175 2.4 200

£ 84000

Other costs Overtime for Band A/B staff

£ 2000

Disposal 175 x 50

£ 8750

**Total costs**

£190750

NB  
OVERTIME  
must be  
sanctioned and  
identified

BUDGET NO.

GOV SGDLONGBOTTOM

MSL Contract No:

Experiments committee only

Approved

Proceed after amendment

Resubmit

Rejected

Chairman of Expt. Committee Signature

Signed

Date

D. P. K. x pp D. F. T. y. p. t. r. c. h

21 June 2011
