# Supplementary material for: Efficacy of Two Chlamydia abortus Subcellular Vaccines in a Pregnant Ewe Challenge Model for Ovine Enzootic Abortion
Source: Vaccines (Basel). 2021 Aug 13;9(8):898. doi: 10.3390/vaccines9080898 (PMC8402522; doi:10.3390/vaccines9080898)
Supplement: Supplementary file 1 [file vaccines-09-00898-s001.zip]

Archive with 4 entries (4 files):
- Livingstone et al - Vaccines - Final Version/E30_11_Approval.pdf
- Livingstone et al - Vaccines - Final Version/Figure S1.pdf
- Livingstone et al - Vaccines - Final Version/Figure S2.pdf
- Livingstone et al - Vaccines - Final Version/Table S1.pdf
